# Supplementary material
Source: publisher site journal article supplement (https://www.dovepress.com/article/331519)
Supplement: Supplementary file 1 [file get_supplementary_file.php]

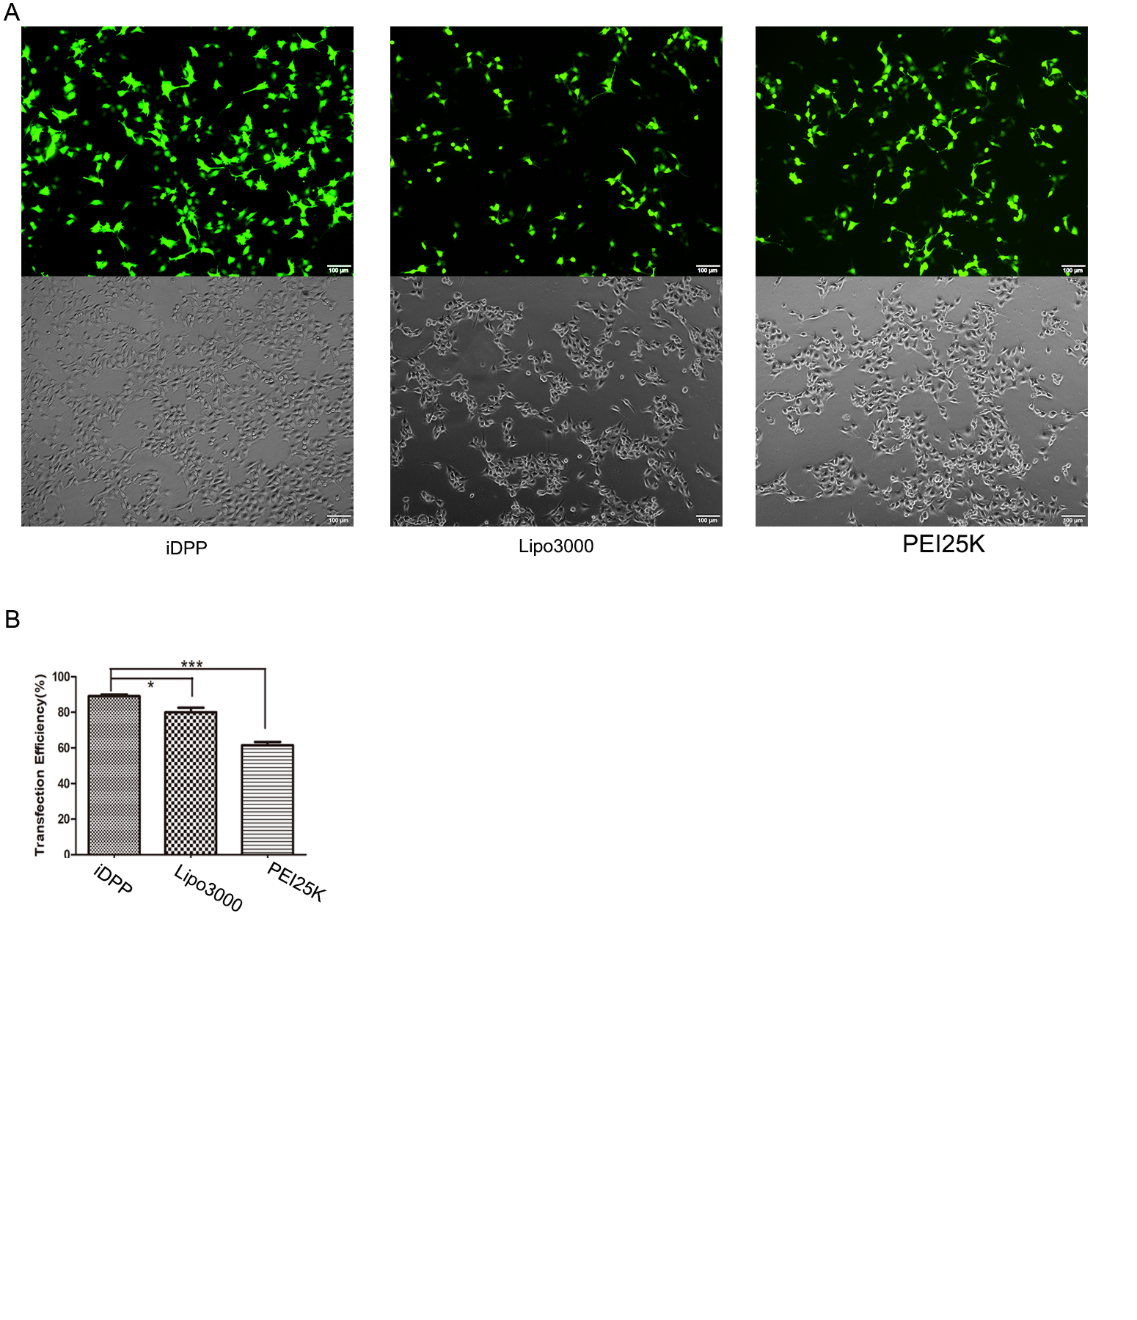


**Supplementary Figure 1. The transfection efficiency of iDPP nanoparticle in B16-F10 cell.** (A) The photograph of the fluorescence microscope picture, scale bar = 100 μm. (B). The analysis of the cyto-flowmetry of the transfection.*P<0.05, ***P<0.001.


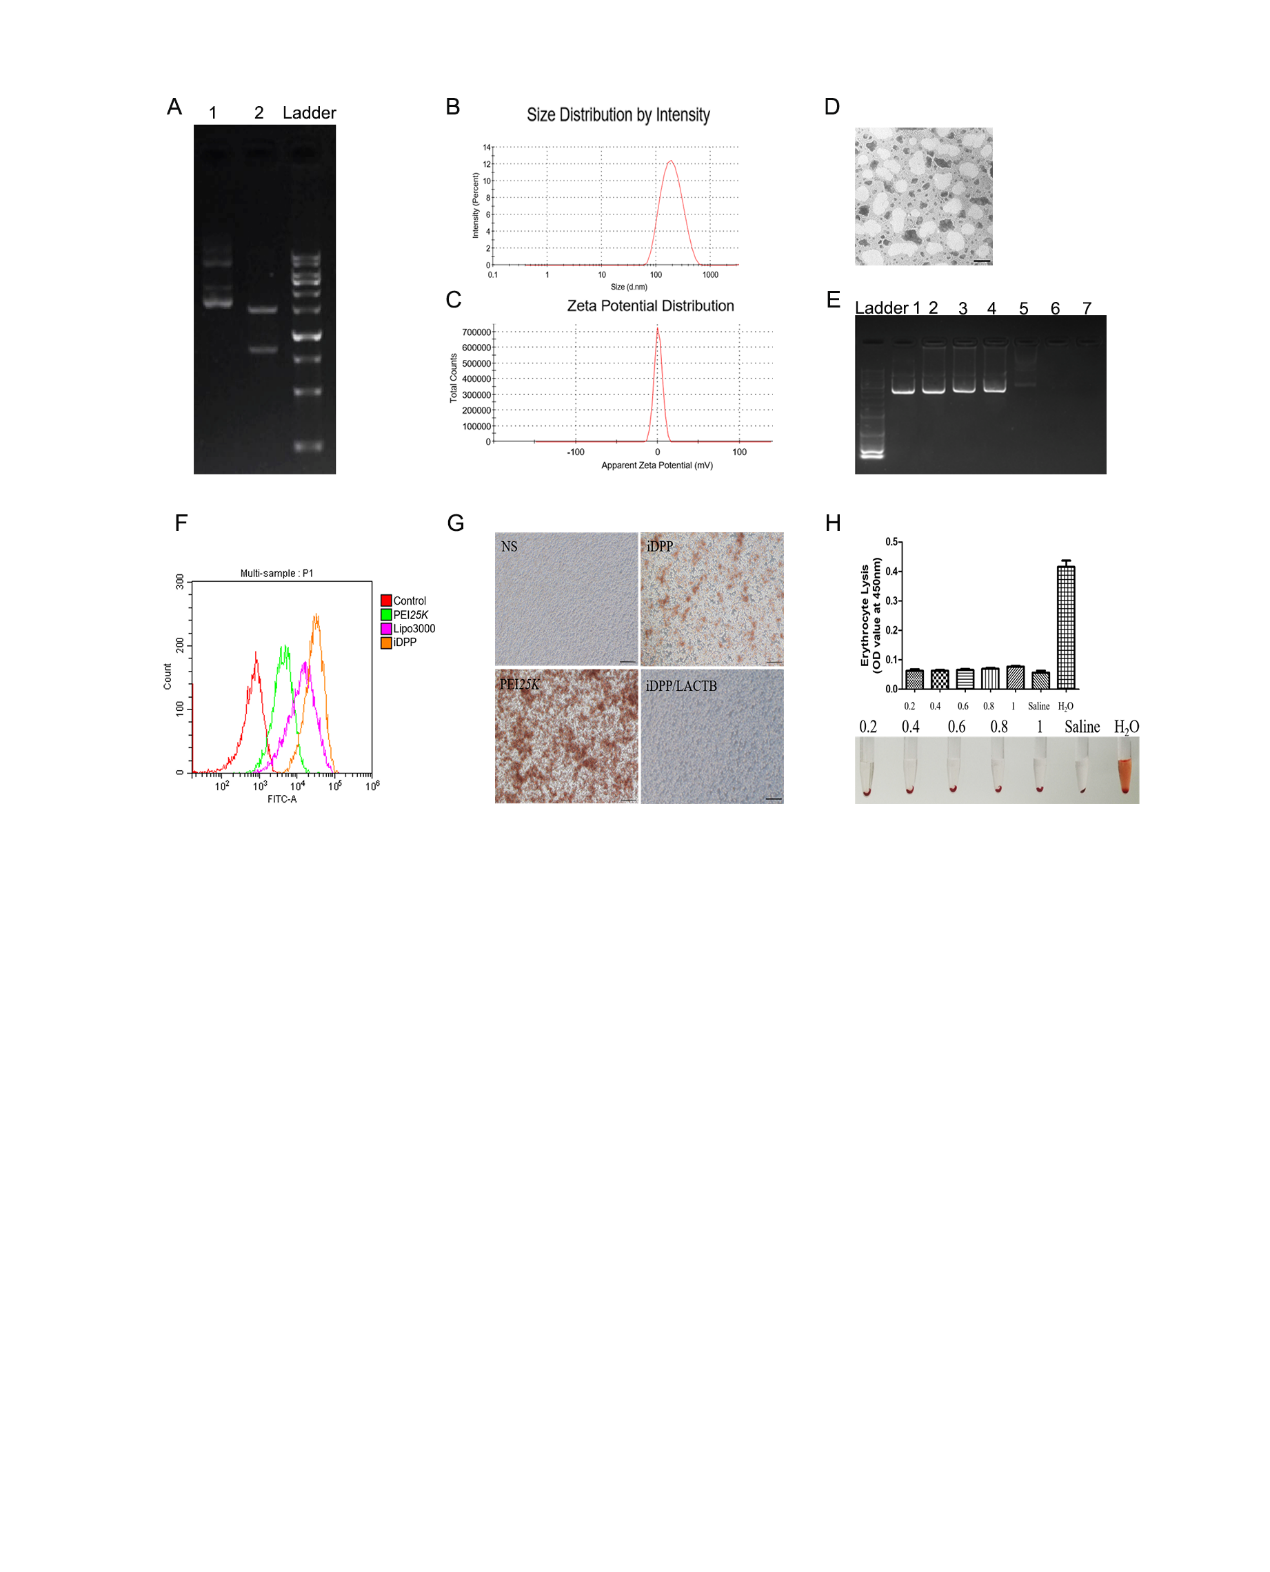


**Supplementary Figure 2. Characteristics of iDPP/*LACTB* nanocomplexes.** (A) Enzyme digestion electrophoresis of LACTB recombinant plasmid. Enzyme digestion of LACTB recombinant plasmid results in two bands: PVAX and LACTB gene, demonstrating the correct linking of LACTB gene to PVAX vector. 1: LACTB recombinant plasmid; 2: Product of enzyme digestion of LACTB recombinant plasmid; Ladder: DNA Ladder. (B-C) The particle size distribution and zeta potential of iDPP/*LACTB* nanocomplexes. (D) The TEM morphology of the iDPP/*LACTB* nanocomplexes. Bar, 200 nm. (E) When combining iDPP nanoparticles to LACTB recombinant plasmid with the mass ratio of 25:1, they can form stable nanocomplexes. Ladder: DNA ladder. (F) YOYO-1 was utilized to label the plasmid. iDPP/*LACTB* nanocomplexes had the highest efficiency in B16-F10 cells. (G) Erythrocyte aggregation assay. iDPP/*LACTB* nanocomplexes do not cause aggregates. Bar, 500 μm. (H) Hemolytic properties of iDPP/*LACTB* nanocomplexes with different concentrations (0.4, 0.6, 0.8, 1 mg/mL). Above concentrations of iDPP/*LACTB* nanocomplexes do not induce hemolysis.
